# Supplementary material for: A machine learning model identifies patients in need of autoimmune disease testing using electronic health records
Source: PubMed Central journal article supplement (PMC10130143; doi:10.1038/s41467-023-37996-7), 2023-04-25
Supplement: 41467_2023_37996_MOESM1_ESM.pdf [file 41467_2023_37996_MOESM1_ESM.pdf]

## Supplementary Information

A machine learning model identifies patients in need of autoimmune disease testing using electronic health records

Iain S. Forrest<sup>1,2,3,4</sup>, Ben O. Petrazzini<sup>1,4</sup>, Áine Duffy<sup>1,4</sup>, Joshua K. Park<sup>1,2,4</sup>, Anya J. O’Neal<sup>5</sup>, Daniel M. Jordan<sup>1,4</sup>, Ghislain Rocheleau<sup>1,4</sup>, Girish N. Nadkarni<sup>1,3,4,6</sup>, Judy H. Cho<sup>1,3,4,6</sup>, Ashira Blazer<sup>7</sup>, Ron Do<sup>\*1,3,4</sup>.

1. The Charles Bronfman Institute for Personalized Medicine, Icahn School of Medicine at Mount Sinai, New York, NY, USA
2. Medical Scientist Training Program, Icahn School of Medicine at Mount Sinai, New York, NY, USA
3. The BioMe Phenomics Center, Icahn School of Medicine at Mount Sinai, New York, NY, USA
4. Department of Genetics and Genomic Sciences, Icahn School of Medicine at Mount Sinai, New York, NY, USA
5. Department of Microbiology and Immunology, University of Maryland School of Medicine, Baltimore, MD, USA
6. Department of Medicine, Icahn School of Medicine at Mount Sinai, New York, NY, USA
7. Division of Rheumatology, Hospital for Special Surgery, New York, NY, USA

**\*Corresponding Author:**

Ron Do, PhD  
Annenberg Building, Floor 18 Room 80B  
1468 Madison Ave  
New York, NY-10029  
Phone Number: 212-241-6206 | Fax Number: 212-849-2643  
[ron.do@mssm.edu](mailto:ron.do@mssm.edu)

## TABLE OF CONTENTS

### Supplementary figures

**Supplementary Fig. 1.** SHapley Additive exPlanations (SHAP) analysis of contribution of top 25 features to model prediction

**Supplementary Fig. 2.** Cohort design evaluation of model performance using rolled up diagnosis codes and medications in internal validation and external test cohorts

**Supplementary Fig. 3.** Model performance in predicting autoantibody testing in a non-biobank dataset

**Supplementary Fig. 4.** Model performance in predicting autoantibody testing in subgroups of individuals less than or equal to 50 years old

**Supplementary Fig. 5.** Model probabilities in subgroups stratified by sex, ethnicity, and education in the BioMe Biobank and All of Us

**Supplementary Fig. 6.** Model performance in predicting rheumatology encounters in an independent dataset

**Supplementary Fig. 7.** Model identification of individuals with autoantibodies and diagnoses for SARDs in the external test dataset

**Supplementary Fig. 8.** Selection of study participants from the BioMe Biobank, All of Us, and Mount Sinai Data Warehouse (MSDW)

**Supplementary Fig. 9.** Training, validation, external testing, and holdout set evaluation of machine learning model

### Supplementary tables

**Supplementary Table 1.** International Classification of Diseases-10 (ICD-10) diagnosis codes and autoantibody tests corresponding to systemic autoimmune rheumatic diseases (SARDs)

**Supplementary Table 2.** Top 25 most important features in machine learning model

**Supplementary Table 3.** Performance metrics of model evaluated with cohort design using rolled up diagnosis codes and medications

**Supplementary Table 4.** Summary of study participants with and without autoantibody testing in a non-biobank dataset

**Supplementary Table 5.** Performance metrics of model in subgroups of individuals less than or equal to 50 years old

**Supplementary Table 6.** Summary of study participants with and without rheumatology encounters in an independent dataset

**Supplementary Table 7.** Performance metrics of machine learning models predicting future autoantibody testing

**Supplementary Table 8.** Performance metrics of machine learning models predicting future encounter with rheumatologist

**Supplementary Table 9.** Clinical features used to train machine learning model

**Supplementary Table 10.** Set of 18 autoimmune conditions for validation of model

## SUPPLEMENTARY FIGURES

**Supplementary Fig. 1.** SHapley Additive exPlanations (SHAP) analysis of contribution of top 25 features to model prediction.

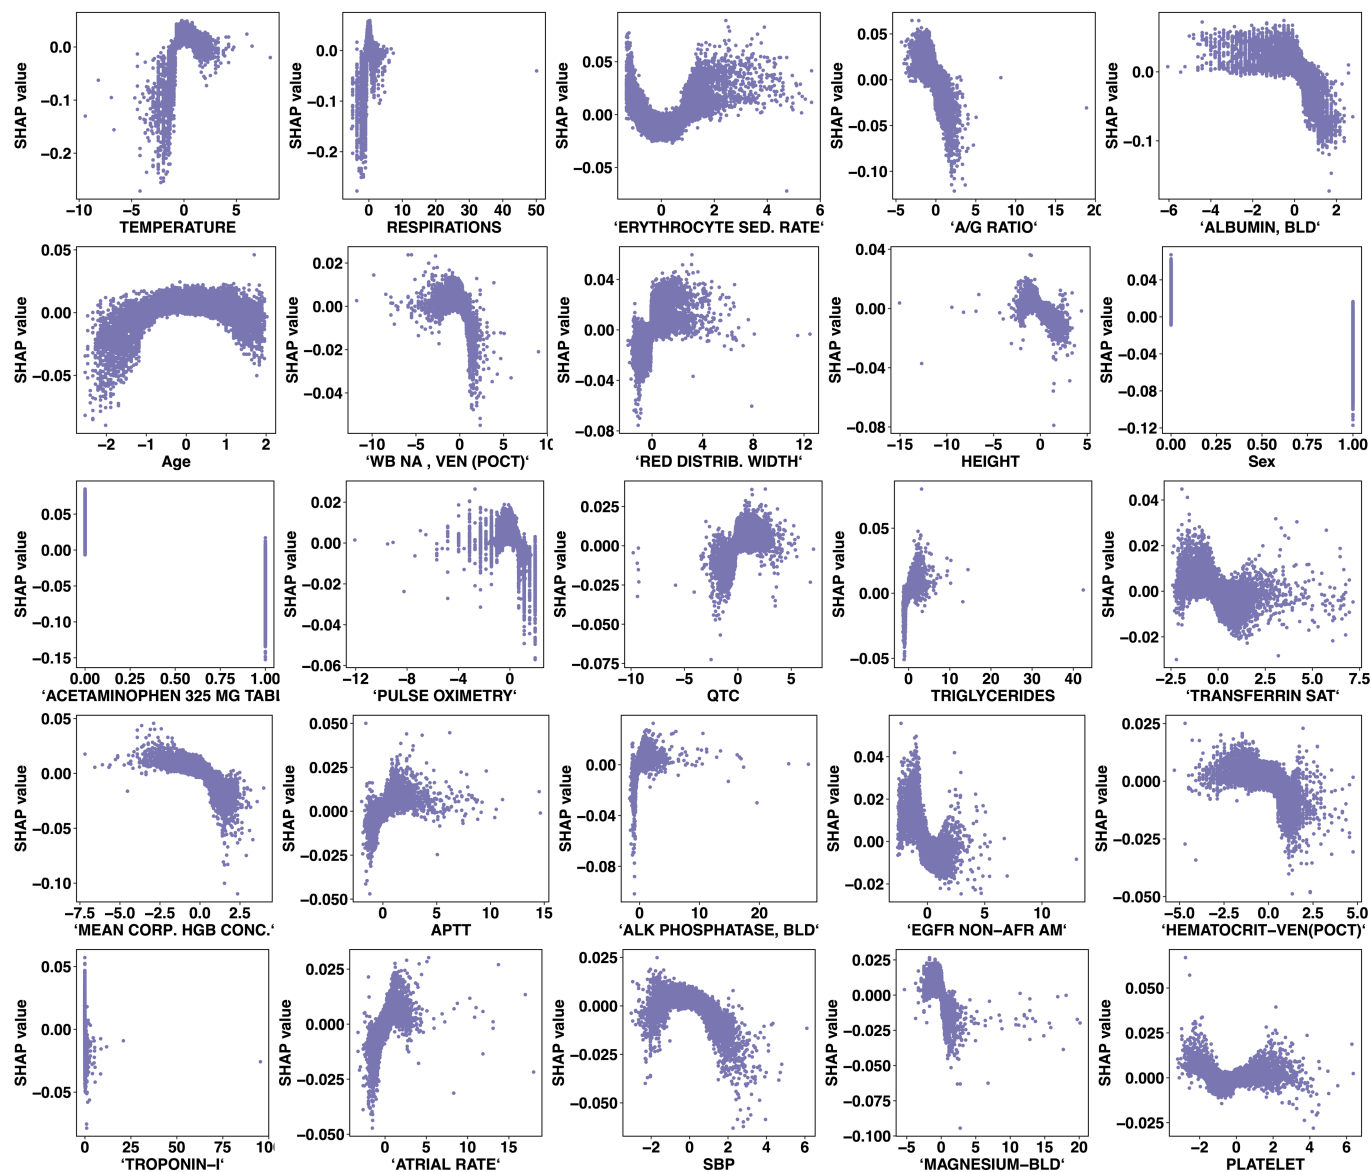

Each point represents one observation; deviation of the value from the mean population value is shown on the X axis. Categorical features are encoded as 1 or 0; continuous features are scaled and centered. A/G, albumin/globulin; APTT, activated partial thromboplastin time; EGFR NON-AFR AM, estimated glomerular filtration rate non-African American; SBP, systolic blood pressure.

**Supplementary Fig. 2.** Cohort design evaluation of model performance using rolled up diagnosis codes and medications in internal validation and external test cohorts.

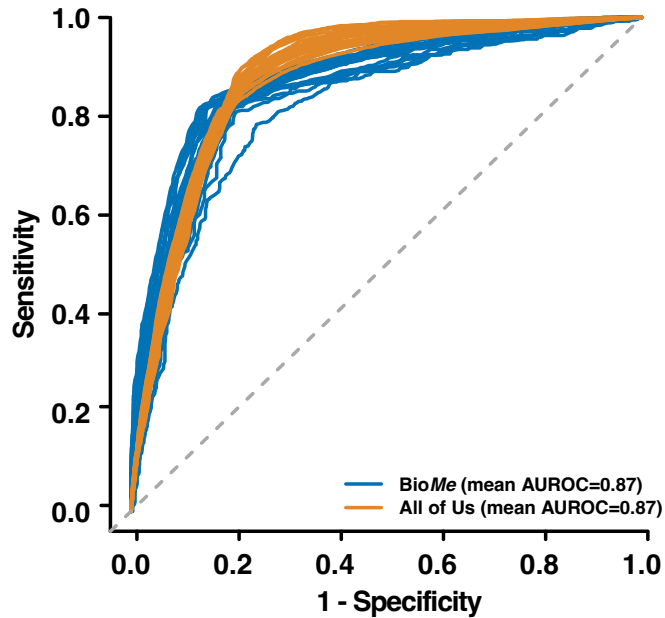

For each given year from 1999-2019, the model was assessed in a cohort design to predict autoantibody testing in the subsequent year. The model used rolled up features of diagnosis codes (e.g., M19 feature contains any sublevels such as M19.0, M19.01, M19.011, etc.) and medications (e.g., acetaminophen feature contains acetaminophen of different dosages). Performance of the model in each year in the internal validation cohort from the BioMe Biobank (BioMe) and the external test cohort from All of Us is depicted as a receiver-operating-characteristic curve, and the mean area under the receiver-operating-characteristic curve (AUROC) across all years is reported in the legend. See Supplementary Table 3 for performance metrics of each model.

**Supplementary Fig. 3.** Model performance in predicting autoantibody testing in a non-biobank dataset.

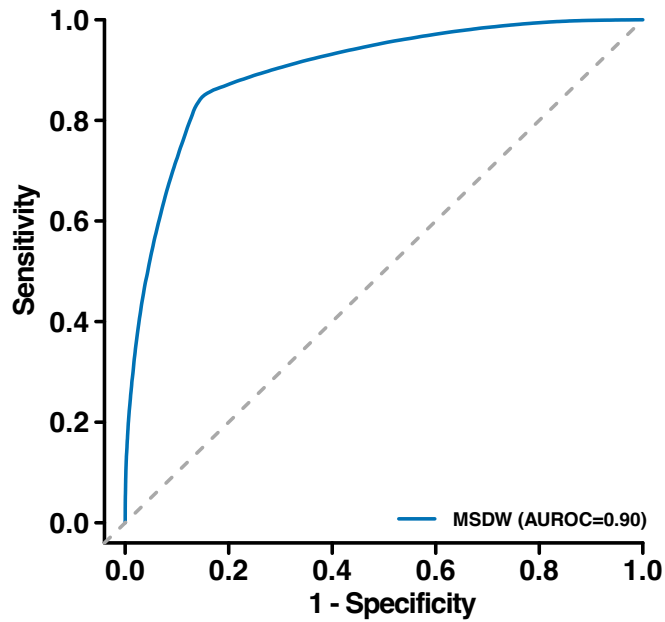

The model was evaluated in a non-biobank cohort of 839,188 participants (67,565 [8.1%] with autoantibody tests) from the Mount Sinai health system found in the Mount Sinai Data Warehouse (MSDW) who had a median of 26 encounters (IQR, 44). In the MSDW dataset, the model had an AUROC of 0.90 (95% CI, 0.89-0.90), accuracy of 0.86 (95% CI, 0.85-0.86), sensitivity of 0.85 (0.85-0.86), specificity of 0.86 (0.86-0.86), negative predictive value of 0.85 (95% CI, 0.85-0.86), and positive predictive value of 0.86 (95% CI, 0.86-0.86).

**Supplementary Fig. 4.** Model performance in predicting autoantibody testing in subgroups of individuals less than or equal to 50 years old.

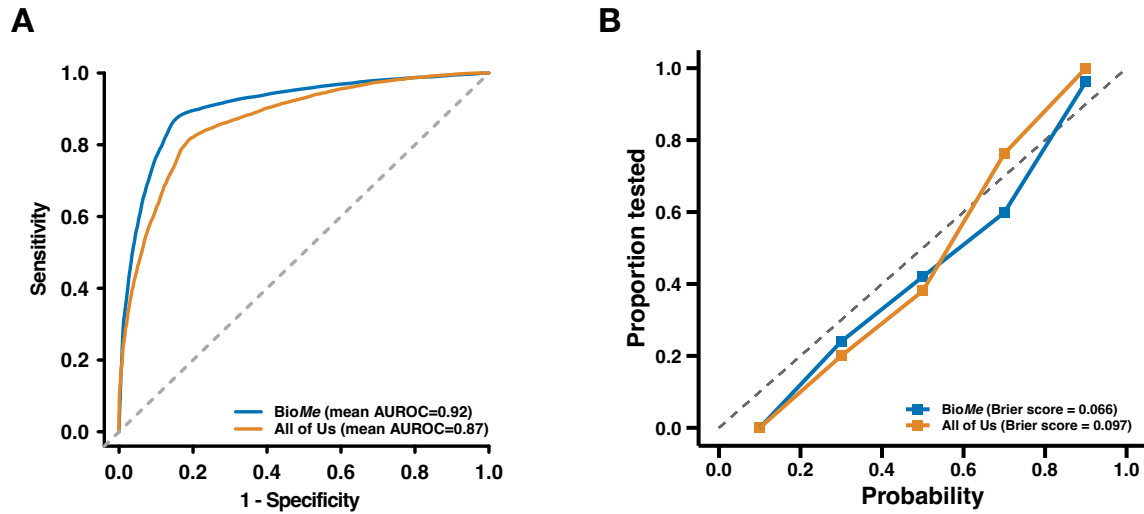

**a-b,** Performance metrics in a subgroup of individuals less than or equal to 50 years old in the validation dataset from BioMe Biobank (BioMe cohort 1) and the external test dataset from All of Us.

**Supplementary Fig. 5.** Model probabilities in subgroups stratified by sex, ethnicity, and education in BioMe Biobank and All of Us.

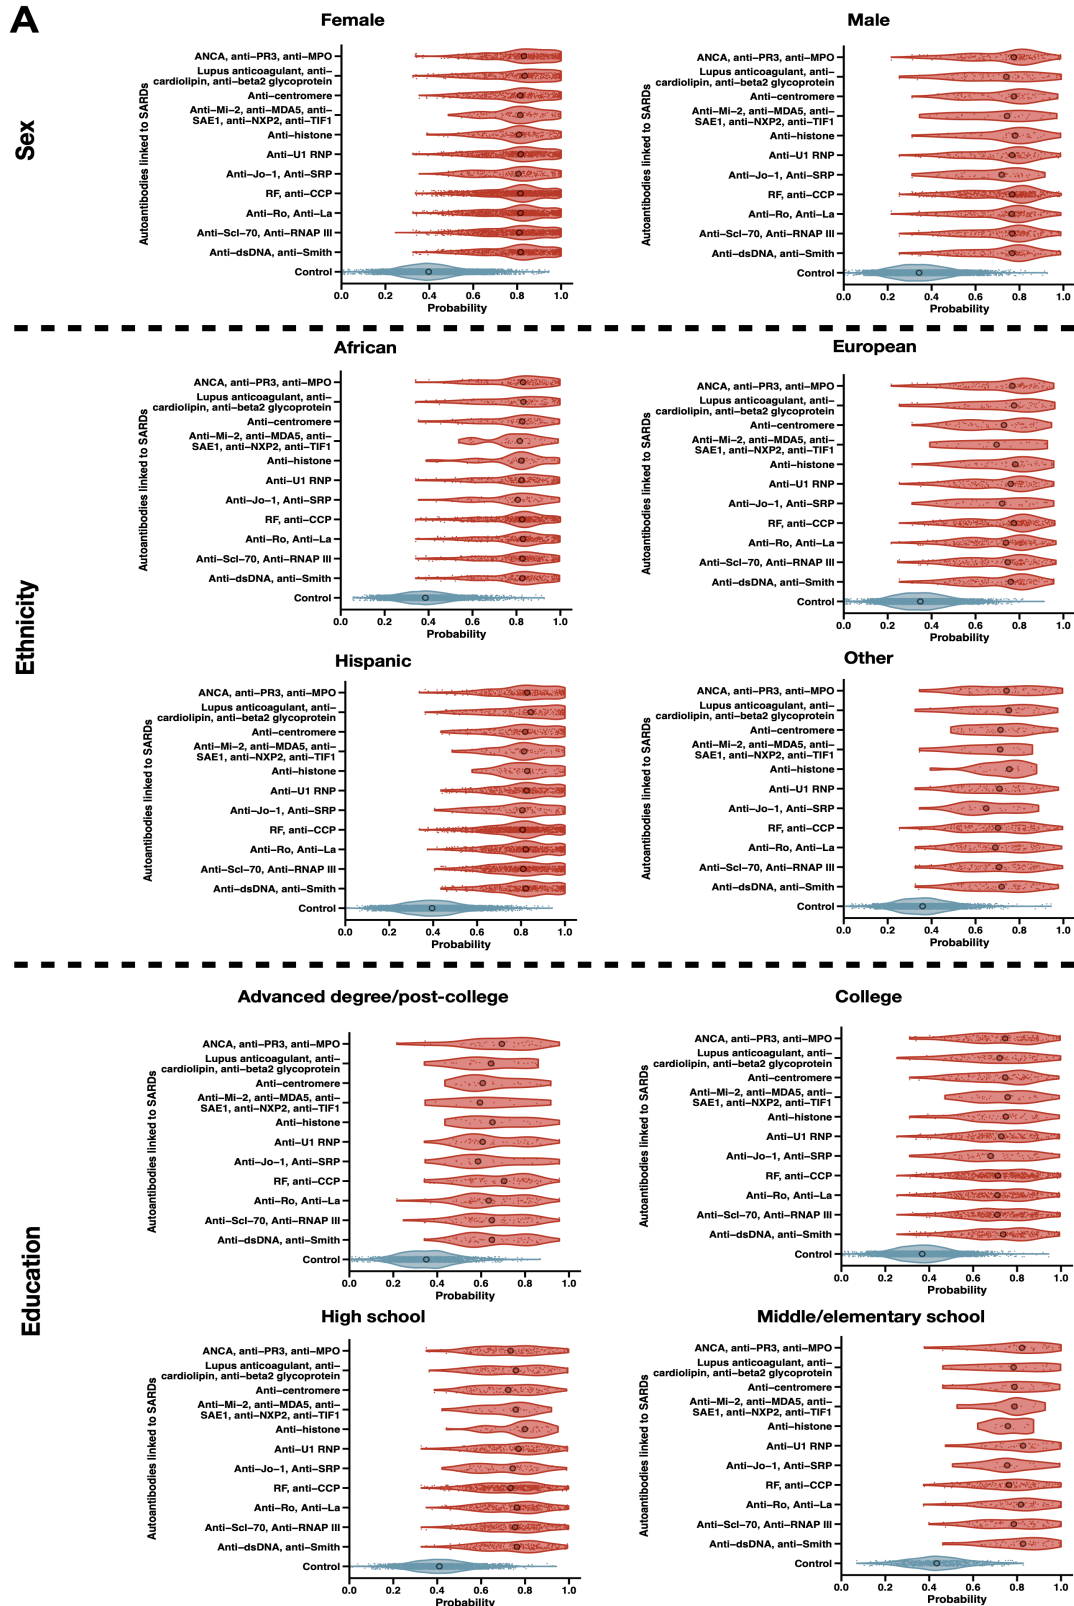

**B**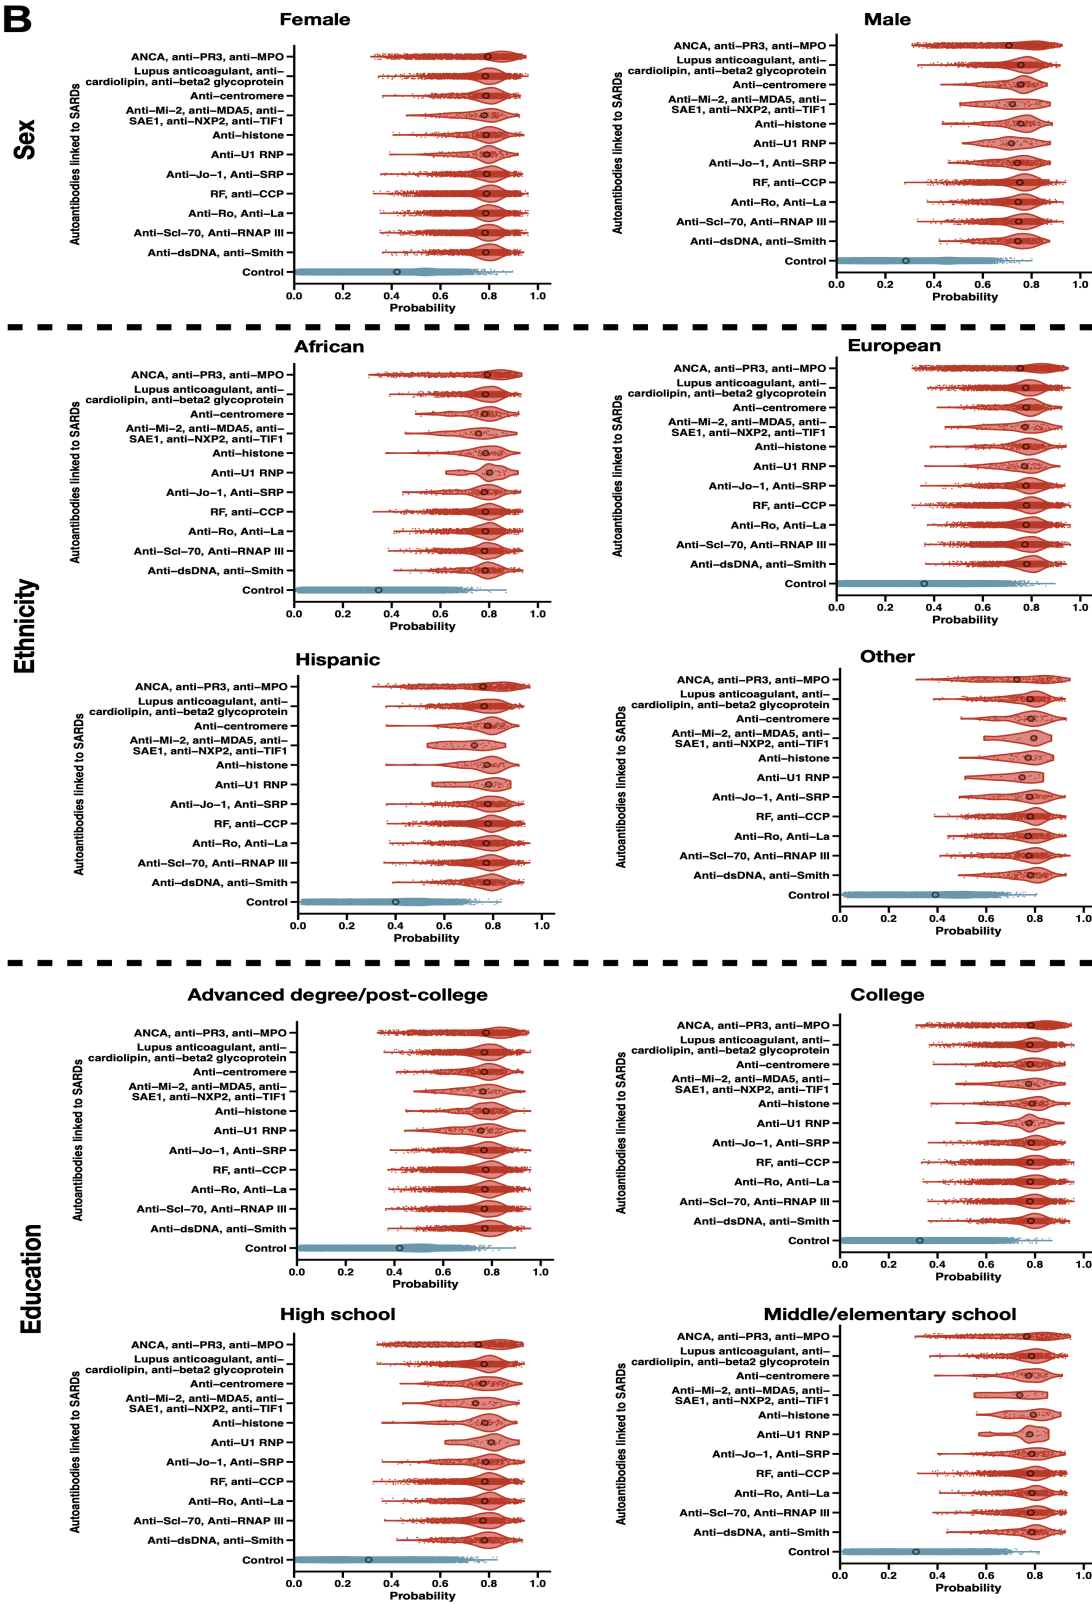

a, BioMe Biobank model-derived probabilities of autoantibody testing for 2,748 participants who had autoantibodies corresponding to SARDs and a rheumatology encounter (red violin plots),



and 20,487 controls who were not tested for autoantibodies and did not have a rheumatology encounter (blue violin plots), stratified by sex, ethnicity, and highest education level. **b**, All of Us model-derived probabilities of autoantibody testing for 24,280 participants who had autoantibodies corresponding to SARDs (red violin plots) and 103,652 controls who were not tested for autoantibodies (blue violin plots), stratified by sex, ethnicity, and highest education level.

**Supplementary Fig. 6.** Model performance in predicting rheumatology encounters in an independent dataset.

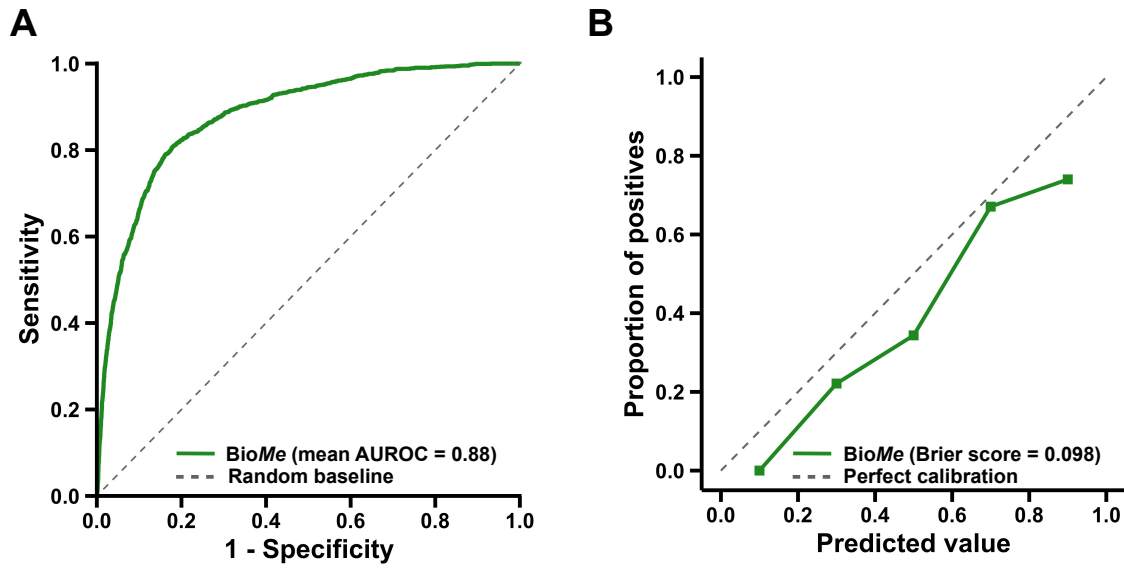

**a-c,** Performance in an independent dataset from BioMe Biobank (BioMe cohort 2). AUROC, area under the receiver-operating-characteristic curve.

**Supplementary Fig. 7.** Model identification of individuals with autoantibodies and diagnoses for SARDs in the external test dataset.

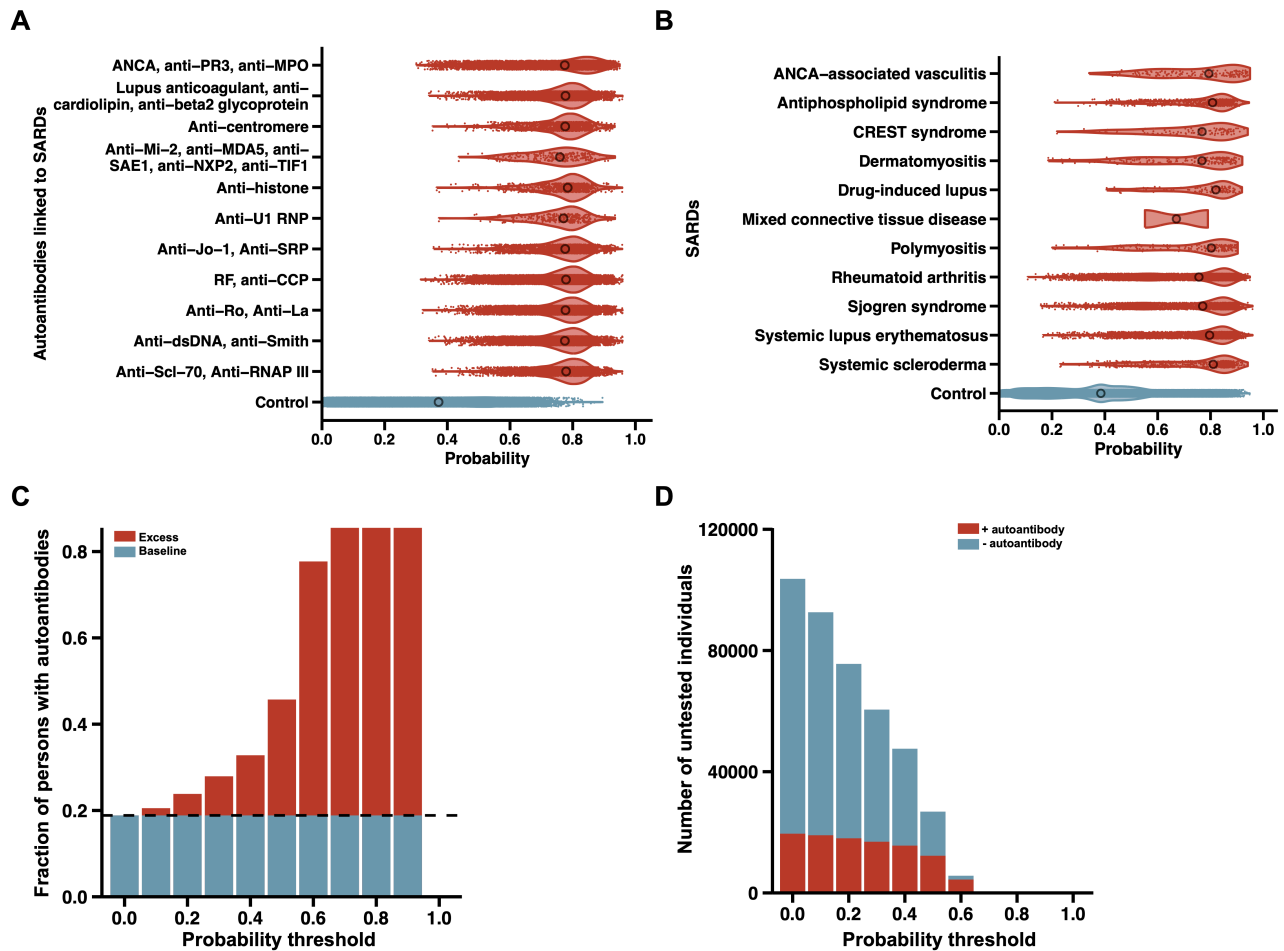

**a**, Model-derived probabilities of autoantibody testing for 24,280 participants who had autoantibodies corresponding to SARDs (red violin plots) and 103,652 controls who were not tested for autoantibodies (blue violin plot). **b**, Probabilities of autoantibody testing for 9,553 participants with SARDs diagnoses (red violin plots) and 119,223 controls without a SARDs diagnosis or autoantibody test (blue violin plots). **c**, Fraction of individuals with autoantibodies identified by the model at increasing probability thresholds. The dashed line and blue portion of the bar plots represent the baseline fraction of autoantibodies detected in the population (0.19; 24,280 out of 128,775) while the red portion of the bar plots indicate the excess fraction of autoantibodies identified by the model at each probability threshold. **d**, Absolute number of individuals who have not been tested for autoantibodies at increasing probability thresholds; the red portion of the bar plots represents those expected to carry autoantibodies at each probability threshold. At thresholds of  $\geq 0.7$  and  $\geq 0.8$ , 275 out of 288 and 18 out of 19 untested individuals are expected to have autoantibodies, respectively. There were 0 untested individuals at a threshold of 0.9 and no individuals had probability of 1.0.

**Supplementary Fig. 8.** Selection of study participants from the BioMe Biobank, All of Us, and Mount Sinai Data Warehouse (MSDW).

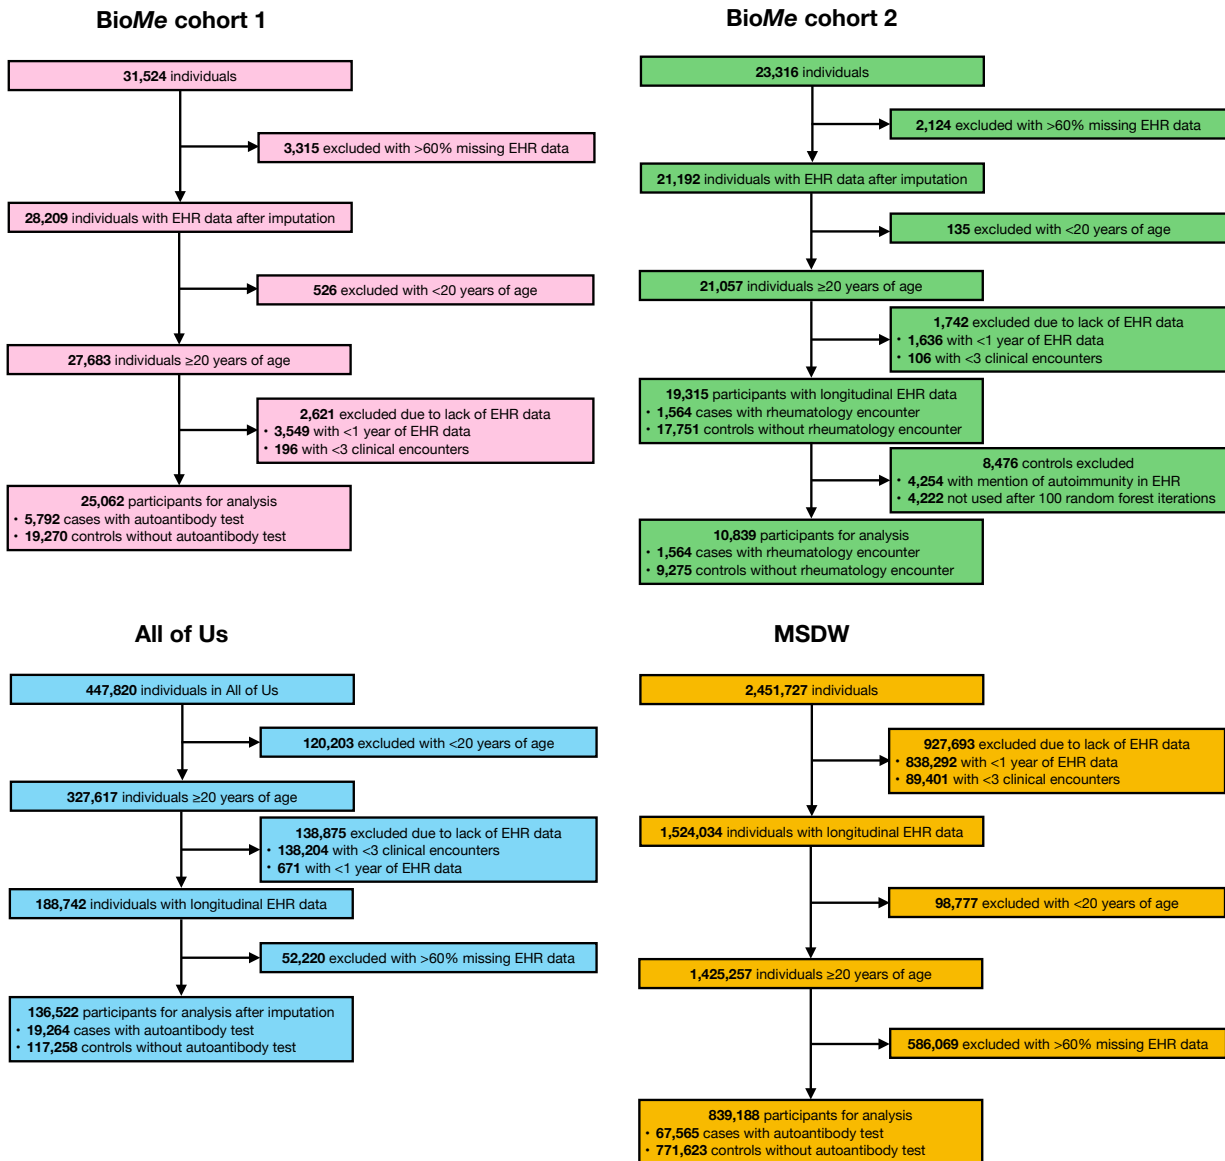

EHR, electronic health record; imputation, random forest-based imputation of continuous laboratory values; rheumatology encounter, individual seen or treated by a rheumatologist; mention of autoimmunity in the EHR, mention of SARDs or autoimmune conditions in clinical notes; not used after 100 random forest iterations, not all controls were included after 100 random forest iterations of a random sample of 90% of cases and an equal number of controls when training and testing the model.

**Supplementary Fig. 9.** Training, validation, external testing, and holdout set evaluation of machine learning model.

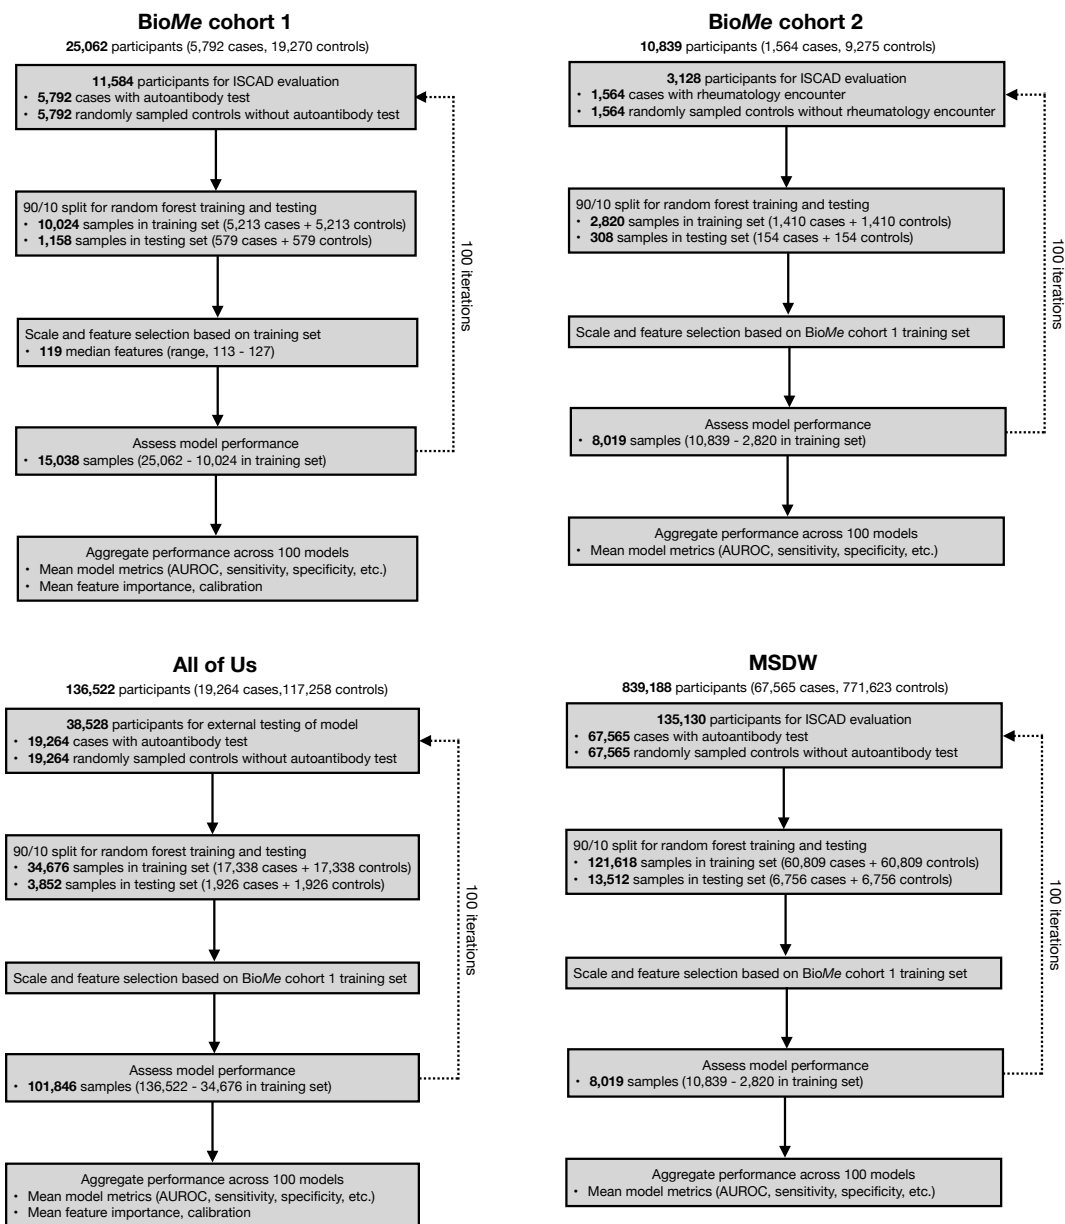

We conducted a study to train, validate, and externally test a machine learning model to predict autoantibody testing using clinical features from the electronic health record (EHR) of participants in two institutions. The model was initially trained and validated in the *BioMe* Biobank cohort 1, and then externally tested in All of Us. The model was further evaluated for prediction of rheumatology encounters in a holdout set in the *BioMe* Biobank cohort 2, and prediction of autoantibody testing in a non-biobank population from the Mount Sinai Data Warehouse (MSDW). Features, clinical features in the EHR (diagnosis codes, medications, laboratory measurements, and vitals); AUROC, area under the receiver-operating characteristic curve.

## SUPPLEMENTARY TABLES

**Supplementary Table 1.** International Classification of Diseases-10 (ICD-10) diagnosis codes and autoantibody tests corresponding to systemic autoimmune rheumatic diseases (SARDs).

| SARDs                                | ICD-10                          | Autoantibody                                                        |
|--------------------------------------|---------------------------------|---------------------------------------------------------------------|
| ANCA-associated vasculitis           | M30.1 M31.3 M31.7 I77.82        | ANCA, anti-PR3, anti-MPO                                            |
| Antiphospholipid syndrome            | D68.61 D68.62                   | Lupus anticoagulant, anti-cardiolipin, anti- $\beta$ 2 glycoprotein |
| Dermatomyositis                      | M33.0 M33.1 M33.9               | Anti-Mi-2, anti-MDA5, anti-SAE1, anti-NXP2, anti-TIF1               |
| Diffuse cutaneous systemic sclerosis | M34*                            | Anti-Scl-70, Anti-RNAP III                                          |
| Drug-induced lupus                   | M32.0                           | Anti-histone                                                        |
| Limited cutaneous systemic sclerosis | M34.1                           | Anti-centromere                                                     |
| Mixed connective tissue disease      | M35.1 M35.8 M35.9               | Anti-U1 RNP                                                         |
| Polymyositis                         | M33.2 M33.9                     | Anti-Jo-1, Anti-SRP                                                 |
| Rheumatoid arthritis                 | M05* M06* M08*                  | RF, anti-CCP                                                        |
| Sjogren syndrome                     | M35.0*                          | Anti-Ro**, Anti-La                                                  |
| Systemic lupus erythematosus         | L93* M32.1* M32.8 M32.9  H01.12 | Anti-dsDNA, anti-Smith                                              |

\*, indicates any ICD-10 diagnosis code below the stated parent level (e.g., M34\* includes M34.0, M34.1, M34.2, M34.8, and M34.9).

\*\*, refers specifically to anti-Ro60.

**Supplementary Table 2.** Top 25 most important features in machine learning model.

| <b>Feature</b>                              | <b>Importance</b> |
|---------------------------------------------|-------------------|
| Temperature                                 | 93                |
| Respirations                                | 84                |
| Erythrocyte sedimentation rate - Westergren | 82                |
| A/G ratio                                   | 67                |
| Albumin, blood                              | 64                |
| Age                                         | 63                |
| White blood cell count                      | 59                |
| Red cell distribution width                 | 59                |
| Neutrophil #                                | 58                |
| Sex                                         | 57                |
| Acetaminophen 325 mg tablet                 | 55                |
| Vitamin D, 25 hydroxy                       | 54                |
| QTc                                         | 54                |
| Triglycerides                               | 53                |
| Transferrin saturation                      | 52                |
| Mean corpuscular hemoglobin concentration   | 52                |
| aPTT                                        | 51                |
| Alkaline phosphatase, blood                 | 51                |
| EGFR non-African American                   | 51                |
| Neutrophil %                                | 50                |
| Troponin-I                                  | 50                |
| Atrial rate                                 | 50                |
| Systolic blood pressure                     | 50                |
| Magnesium, blood                            | 50                |
| Platelet                                    | 49                |

Feature importance was determined for each feature as the mean weight in training the model across 100 iterations, calculated as the feature's mean percent increase in mean squared error divided by its standard deviation and scaled from 0 (least important) to 100 (most important). Further details and units of measurements for features are shown in **Supplementary Table 9**.

**Supplementary Table 3.** Performance metrics of model evaluated with cohort design using rolled up diagnosis codes and medications.

| Dataset | Year | Total n | Autoantibody tested, n (%) | AUROC (95% CI)     | Sensitivity (95% CI) | Specificity (95% CI) | Accuracy (95% CI)  | NPV (95% CI)       | PPV (95% CI)       |
|---------|------|---------|----------------------------|--------------------|----------------------|----------------------|--------------------|--------------------|--------------------|
| BioMe   | 2019 | 415     | 28 (6.75)                  | 0.86 (0.81 - 0.88) | 0.87 (0.84 - 0.9)    | 0.87 (0.83 - 0.9)    | 0.87 (0.84 - 0.89) | 0.87 (0.84 - 0.9)  | 0.87 (0.84 - 0.9)  |
| BioMe   | 2018 | 470     | 18 (3.83)                  | 0.85 (0.81 - 0.87) | 0.86 (0.82 - 0.89)   | 0.86 (0.84 - 0.88)   | 0.86 (0.84 - 0.88) | 0.86 (0.83 - 0.89) | 0.86 (0.84 - 0.88) |
| BioMe   | 2017 | 764     | 33 (4.32)                  | 0.86 (0.82 - 0.88) | 0.84 (0.82 - 0.86)   | 0.85 (0.84 - 0.87)   | 0.85 (0.83 - 0.86) | 0.84 (0.82 - 0.86) | 0.85 (0.83 - 0.86) |
| BioMe   | 2016 | 886     | 42 (4.74)                  | 0.82 (0.79 - 0.84) | 0.83 (0.81 - 0.85)   | 0.82 (0.8 - 0.84)    | 0.82 (0.81 - 0.83) | 0.83 (0.81 - 0.84) | 0.82 (0.81 - 0.84) |
| BioMe   | 2015 | 1209    | 65 (5.38)                  | 0.86 (0.83 - 0.86) | 0.87 (0.85 - 0.89)   | 0.84 (0.83 - 0.86)   | 0.86 (0.85 - 0.87) | 0.87 (0.85 - 0.89) | 0.85 (0.84 - 0.86) |
| BioMe   | 2014 | 1825    | 169 (9.26)                 | 0.88 (0.85 - 0.88) | 0.86 (0.84 - 0.87)   | 0.84 (0.83 - 0.86)   | 0.85 (0.84 - 0.86) | 0.85 (0.84 - 0.87) | 0.85 (0.84 - 0.86) |
| BioMe   | 2013 | 1755    | 140 (7.98)                 | 0.85 (0.83 - 0.85) | 0.84 (0.83 - 0.85)   | 0.84 (0.83 - 0.86)   | 0.84 (0.84 - 0.85) | 0.84 (0.83 - 0.85) | 0.85 (0.83 - 0.86) |
| BioMe   | 2012 | 2782    | 213 (7.66)                 | 0.9 (0.88 - 0.89)  | 0.83 (0.82 - 0.84)   | 0.86 (0.85 - 0.87)   | 0.84 (0.84 - 0.85) | 0.83 (0.83 - 0.84) | 0.85 (0.84 - 0.86) |
| BioMe   | 2011 | 3371    | 242 (7.18)                 | 0.89 (0.87 - 0.89) | 0.83 (0.82 - 0.84)   | 0.87 (0.86 - 0.88)   | 0.85 (0.84 - 0.85) | 0.83 (0.83 - 0.84) | 0.86 (0.85 - 0.87) |
| BioMe   | 2010 | 3693    | 221 (5.98)                 | 0.89 (0.87 - 0.89) | 0.84 (0.84 - 0.85)   | 0.84 (0.84 - 0.85)   | 0.84 (0.84 - 0.85) | 0.84 (0.84 - 0.85) | 0.84 (0.84 - 0.85) |
| BioMe   | 2009 | 4630    | 195 (4.21)                 | 0.89 (0.88 - 0.89) | 0.84 (0.83 - 0.85)   | 0.84 (0.83 - 0.85)   | 0.84 (0.84 - 0.85) | 0.84 (0.84 - 0.85) | 0.84 (0.84 - 0.85) |
| BioMe   | 2008 | 3818    | 258 (6.76)                 | 0.89 (0.88 - 0.89) | 0.82 (0.81 - 0.83)   | 0.87 (0.86 - 0.88)   | 0.84 (0.84 - 0.85) | 0.83 (0.82 - 0.84) | 0.86 (0.85 - 0.87) |



|           |      |       |             |                    |                    |                    |                    |                    |                    |
|-----------|------|-------|-------------|--------------------|--------------------|--------------------|--------------------|--------------------|--------------------|
| BioMe     | 2007 | 3309  | 155 (4.68)  | 0.89 (0.88 - 0.89) | 0.83 (0.82 - 0.84) | 0.86 (0.86 - 0.87) | 0.85 (0.84 - 0.85) | 0.84 (0.83 - 0.84) | 0.86 (0.85 - 0.87) |
| BioMe     | 2006 | 2541  | 136 (5.35)  | 0.88 (0.86 - 0.88) | 0.83 (0.82 - 0.84) | 0.84 (0.83 - 0.85) | 0.84 (0.83 - 0.84) | 0.83 (0.83 - 0.84) | 0.84 (0.83 - 0.85) |
| BioMe     | 2005 | 2227  | 132 (5.93)  | 0.87 (0.85 - 0.87) | 0.84 (0.83 - 0.85) | 0.82 (0.82 - 0.83) | 0.83 (0.82 - 0.84) | 0.84 (0.83 - 0.85) | 0.83 (0.82 - 0.83) |
| BioMe     | 2004 | 1257  | 48 (3.82)   | 0.88 (0.85 - 0.88) | 0.83 (0.82 - 0.85) | 0.84 (0.82 - 0.85) | 0.84 (0.83 - 0.84) | 0.84 (0.82 - 0.85) | 0.84 (0.83 - 0.85) |
| BioMe     | 2003 | 1106  | 69 (6.24)   | 0.87 (0.84 - 0.87) | 0.83 (0.82 - 0.85) | 0.82 (0.8 - 0.84)  | 0.83 (0.82 - 0.84) | 0.83 (0.82 - 0.84) | 0.82 (0.81 - 0.84) |
| BioMe     | 2002 | 1097  | 59 (5.38)   | 0.88 (0.85 - 0.88) | 0.84 (0.83 - 0.85) | 0.84 (0.82 - 0.86) | 0.84 (0.83 - 0.85) | 0.84 (0.83 - 0.85) | 0.84 (0.83 - 0.85) |
| BioMe     | 2001 | 1198  | 85 (7.1)    | 0.86 (0.84 - 0.86) | 0.82 (0.81 - 0.84) | 0.82 (0.8 - 0.83)  | 0.82 (0.81 - 0.83) | 0.82 (0.81 - 0.84) | 0.82 (0.81 - 0.83) |
| BioMe     | 2000 | 1586  | 26 (1.64)   | 0.86 (0.84 - 0.86) | 0.86 (0.85 - 0.87) | 0.81 (0.8 - 0.82)  | 0.83 (0.82 - 0.84) | 0.85 (0.84 - 0.86) | 0.82 (0.81 - 0.83) |
| BioMe     | 1999 | 1730  | 16 (0.92)   | 0.89 (0.87 - 0.89) | 0.86 (0.85 - 0.87) | 0.83 (0.82 - 0.84) | 0.84 (0.83 - 0.85) | 0.85 (0.84 - 0.86) | 0.83 (0.82 - 0.84) |
| All of Us | 2019 | 68720 | 787 (1.15)  | 0.86 (0.86 - 0.88) | 0.8 (0.79 - 0.81)  | 0.84 (0.83 - 0.85) | 0.82 (0.82 - 0.82) | 0.81 (0.8 - 0.81)  | 0.83 (0.83 - 0.84) |
| All of Us | 2018 | 72691 | 1193 (1.64) | 0.87 (0.87 - 0.88) | 0.81 (0.8 - 0.82)  | 0.84 (0.83 - 0.84) | 0.82 (0.82 - 0.83) | 0.82 (0.81 - 0.82) | 0.83 (0.83 - 0.84) |
| All of Us | 2017 | 62130 | 1334 (2.15) | 0.86 (0.87 - 0.88) | 0.82 (0.81 - 0.83) | 0.83 (0.83 - 0.83) | 0.82 (0.82 - 0.83) | 0.82 (0.81 - 0.83) | 0.83 (0.83 - 0.83) |
| All of Us | 2016 | 53780 | 1100 (2.05) | 0.86 (0.87 - 0.88) | 0.83 (0.82 - 0.85) | 0.83 (0.82 - 0.83) | 0.83 (0.82 - 0.84) | 0.83 (0.82 - 0.84) | 0.83 (0.82 - 0.83) |
| All of Us | 2015 | 46059 | 968 (2.1)   | 0.86 (0.87 - 0.88) | 0.85 (0.84 - 0.87) | 0.82 (0.81 - 0.83) | 0.83 (0.83 - 0.84) | 0.85 (0.84 - 0.86) | 0.82 (0.82 - 0.83) |
| All of Us | 2014 | 40444 | 755 (1.87)  | 0.86 (0.87 - 0.88) | 0.86 (0.85 - 0.87) | 0.81 (0.8 - 0.82)  | 0.84 (0.83 - 0.84) | 0.85 (0.84 - 0.86) | 0.82 (0.82 - 0.82) |

|           |      |       |            |                    |                    |                    |                    |                    |                    |
|-----------|------|-------|------------|--------------------|--------------------|--------------------|--------------------|--------------------|--------------------|
| All of Us | 2013 | 32784 | 605 (1.85) | 0.86 (0.87 - 0.88) | 0.84 (0.82 - 0.85) | 0.82 (0.81 - 0.83) | 0.83 (0.82 - 0.83) | 0.83 (0.82 - 0.85) | 0.82 (0.82 - 0.83) |
| All of Us | 2012 | 26613 | 528 (1.98) | 0.86 (0.86 - 0.87) | 0.85 (0.84 - 0.86) | 0.81 (0.8 - 0.81)  | 0.83 (0.82 - 0.83) | 0.84 (0.83 - 0.85) | 0.81 (0.81 - 0.82) |
| All of Us | 2011 | 21716 | 475 (2.19) | 0.86 (0.87 - 0.88) | 0.86 (0.85 - 0.87) | 0.81 (0.81 - 0.82) | 0.83 (0.83 - 0.84) | 0.85 (0.84 - 0.86) | 0.82 (0.82 - 0.82) |
| All of Us | 2010 | 18102 | 396 (2.19) | 0.87 (0.87 - 0.88) | 0.87 (0.86 - 0.88) | 0.81 (0.8 - 0.81)  | 0.84 (0.83 - 0.84) | 0.86 (0.85 - 0.87) | 0.82 (0.81 - 0.82) |
| All of Us | 2009 | 14095 | 325 (2.31) | 0.87 (0.87 - 0.89) | 0.87 (0.86 - 0.87) | 0.82 (0.81 - 0.82) | 0.84 (0.84 - 0.85) | 0.86 (0.85 - 0.87) | 0.82 (0.82 - 0.83) |
| All of Us | 2008 | 13005 | 299 (2.3)  | 0.87 (0.87 - 0.89) | 0.87 (0.85 - 0.89) | 0.81 (0.8 - 0.82)  | 0.84 (0.83 - 0.85) | 0.86 (0.84 - 0.88) | 0.82 (0.81 - 0.83) |
| All of Us | 2007 | 10584 | 262 (2.48) | 0.87 (0.88 - 0.89) | 0.88 (0.87 - 0.89) | 0.82 (0.81 - 0.82) | 0.85 (0.84 - 0.86) | 0.87 (0.86 - 0.88) | 0.83 (0.82 - 0.83) |
| All of Us | 2006 | 9530  | 192 (2.01) | 0.87 (0.86 - 0.89) | 0.86 (0.85 - 0.88) | 0.81 (0.8 - 0.81)  | 0.84 (0.83 - 0.84) | 0.86 (0.84 - 0.87) | 0.82 (0.81 - 0.82) |
| All of Us | 2005 | 7537  | 156 (2.07) | 0.87 (0.87 - 0.88) | 0.87 (0.86 - 0.88) | 0.81 (0.8 - 0.82)  | 0.84 (0.83 - 0.85) | 0.86 (0.86 - 0.87) | 0.82 (0.81 - 0.83) |
| All of Us | 2004 | 6132  | 145 (2.36) | 0.88 (0.88 - 0.9)  | 0.9 (0.88 - 0.91)  | 0.8 (0.79 - 0.82)  | 0.85 (0.84 - 0.86) | 0.89 (0.87 - 0.9)  | 0.82 (0.81 - 0.83) |
| All of Us | 2003 | 4952  | 119 (2.4)  | 0.88 (0.87 - 0.9)  | 0.86 (0.84 - 0.87) | 0.82 (0.81 - 0.82) | 0.84 (0.83 - 0.85) | 0.85 (0.83 - 0.87) | 0.82 (0.81 - 0.83) |
| All of Us | 2002 | 3641  | 98 (2.69)  | 0.87 (0.87 - 0.89) | 0.87 (0.85 - 0.89) | 0.82 (0.8 - 0.83)  | 0.84 (0.83 - 0.86) | 0.86 (0.84 - 0.88) | 0.82 (0.81 - 0.84) |
| All of Us | 2001 | 3490  | 98 (2.81)  | 0.88 (0.88 - 0.9)  | 0.88 (0.86 - 0.89) | 0.81 (0.8 - 0.82)  | 0.84 (0.83 - 0.85) | 0.87 (0.85 - 0.88) | 0.82 (0.81 - 0.83) |
| All of Us | 2000 | 2806  | 72 (2.57)  | 0.88 (0.88 - 0.9)  | 0.88 (0.86 - 0.91) | 0.81 (0.79 - 0.83) | 0.85 (0.83 - 0.86) | 0.88 (0.85 - 0.9)  | 0.82 (0.81 - 0.84) |
| All of Us | 1999 | 2182  | 50 (2.29)  | 0.87 (0.87 - 0.9)  | 0.89 (0.86 - 0.92) | 0.8 (0.78 - 0.83)  | 0.85 (0.83 - 0.86) | 0.88 (0.85 - 0.91) | 0.82 (0.8 - 0.84)  |

For each given year from 1999-2019, the model was assessed in a cohort design to predict autoantibody testing in the subsequent year. The model used rolled up features of diagnosis codes (e.g., M19 feature contains any sublevels such as M19.0, M19.01, M19.011, etc.) and medications (e.g., acetaminophen feature contains acetaminophen of different dosages). Performance of the model in each year in the internal validation cohort from the *BioMe* Biobank (*BioMe*) and the external test cohort from All of Us is tabulated. Area under the receiver-operating-characteristic curve (AUROC); NPV, negative predictive value; PPV, positive predictive value.

**Supplementary Table 4.** Summary of study participants with and without autoantibody testing in a non-biobank dataset.

| Trait                           | Autoantibody tested<br>(n=67,565) | Not tested (n=771,623) |
|---------------------------------|-----------------------------------|------------------------|
| Age, median (IQR) years         | 58 (28)                           | 54 (33)                |
| Male, n (%)                     | 21,054 (31)                       | 325,472 (42)           |
| Ethnicity, n (%)                |                                   |                        |
| African                         | 10,887 (16)                       | 112,914 (15)           |
| European                        | 33,760 (50)                       | 394,815 (51)           |
| Hispanic                        | 18,468 (27)                       | 217,079 (28)           |
| Other                           | 4,548 (6.7)                       | 47,850 (6.2)           |
| Interactions with health system |                                   |                        |
| Duration, median (IQR) years    | 6.0 (6.1)                         | 5.0 (5.4)              |
| Encounters, median (IQR)        | 52 (90)                           | 25 (41)                |

Non-biobank dataset was from the Mount Sinai Data Warehouse (MSDW). Age, age at last clinical encounter; Ethnicity, self-reported ethnicity; Other, self-reported ethnicity other than the listed ones; Duration, length of electronic health record.

**Supplementary Table 5.** Performance metrics of model in subgroups of individuals less than or equal to 50 years old.

| Dataset       | AUROC<br>(95% CI)  | Sensitivity<br>(95% CI) | Specificity<br>(95% CI) | Accuracy<br>(95% CI) | NPV<br>(95% CI)    | PPV<br>(95% CI)    |
|---------------|--------------------|-------------------------|-------------------------|----------------------|--------------------|--------------------|
| BioMe Biobank | 0.92 (0.91 - 0.92) | 0.90 (0.90 - 0.91)      | 0.86 (0.85 - 0.87)      | 0.87 (0.86 - 0.87)   | 0.90 (0.89 - 0.90) | 0.88 (0.87 - 0.88) |
| All of Us     | 0.87 (0.87 - 0.87) | 0.82 (0.81 - 0.82)      | 0.82 (0.81 - 0.82)      | 0.82 (0.81 - 0.82)   | 0.82 (0.82 - 0.82) | 0.82 (0.81 - 0.82) |

AUROC, area under the receiver-operating-characteristic curve; NPV, negative predictive value; PPV, positive predictive value.

**Supplementary Table 6.** Summary of study participants with and without rheumatology encounters in an independent dataset.

| Trait                             | Rheumatology encounter<br>(n=1,564) | No rheumatology encounter<br>(n=9,275) |
|-----------------------------------|-------------------------------------|----------------------------------------|
| Age, median (IQR) years           | 60 (21)                             | 55 (29)                                |
| Male, n (%)                       | 429 (27)                            | 6044 (45)                              |
| Ethnicity, n (%)                  |                                     |                                        |
| African                           | 297 (19)                            | 2322 (17)                              |
| European                          | 277 (18)                            | 4621 (34)                              |
| Hispanic                          | 790 (51)                            | 4081 (30)                              |
| Other                             | 200 (13)                            | 2474 (18)                              |
| Interactions with health system   |                                     |                                        |
| Unique ICD-10 codes, median (IQR) | 69 (55)                             | 29 (31)                                |
| Duration, median (IQR) years      | 7.3 (4.3)                           | 5.6 (4.7)                              |
| Encounters, median (IQR)          | 87 (90)                             | 32 (45)                                |

Independent dataset was from BioMe cohort 2. Age, age at last clinical encounter; Ethnicity, self-reported ethnicity; Other, self-reported ethnicity other than the listed ones; ICD-10, International Classification of Diseases 10; Duration, length of electronic health record.

**Supplementary Table 7.** Performance metrics of machine learning models predicting future autoantibody testing.

| Time prior to test date (years) | AUROC (95% CI)     | Sensitivity (95% CI) | Specificity (95% CI) | Accuracy (95% CI)  | NPV (95% CI)       | PPV (95% CI)       |
|---------------------------------|--------------------|----------------------|----------------------|--------------------|--------------------|--------------------|
| 0                               | 0.93 (0.92 - 0.93) | 0.91 (0.90 - 0.91)   | 0.88 (0.87 - 0.88)   | 0.89 (0.89 - 0.89) | 0.90 (0.90 - 0.91) | 0.88 (0.88 - 0.88) |
| 0.5                             | 0.93 (0.93 - 0.94) | 0.84 (0.84 - 0.85)   | 0.87 (0.87 - 0.87)   | 0.86 (0.85 - 0.86) | 0.85 (0.84 - 0.85) | 0.87 (0.86 - 0.87) |
| 1                               | 0.92 (0.92 - 0.93) | 0.84 (0.84 - 0.85)   | 0.86 (0.86 - 0.86)   | 0.85 (0.85 - 0.85) | 0.85 (0.84 - 0.85) | 0.86 (0.86 - 0.86) |
| 3                               | 0.92 (0.92 - 0.93) | 0.85 (0.85 - 0.86)   | 0.86 (0.85 - 0.86)   | 0.85 (0.85 - 0.86) | 0.85 (0.85 - 0.86) | 0.86 (0.85 - 0.86) |
| 5                               | 0.91 (0.91 - 0.91) | 0.87 (0.87 - 0.88)   | 0.84 (0.84 - 0.85)   | 0.86 (0.86 - 0.86) | 0.87 (0.87 - 0.87) | 0.85 (0.85 - 0.85) |

Time prior to test date (years), number of years that electronic health record data was restricted to prior to first test date; AUROC, area under the receiver-operating-characteristic curve; NPV, negative predictive value; PPV, positive predictive value.

**Supplementary Table 8.** Performance metrics of machine learning models predicting future encounter with rheumatologist.

| Time prior to encounter date (years) | AUROC (95% CI)     | Sensitivity (95% CI) | Specificity (95% CI) | Accuracy (95% CI)  | NPV (95% CI)       | PPV (95% CI)       |
|--------------------------------------|--------------------|----------------------|----------------------|--------------------|--------------------|--------------------|
| 0                                    | 0.94 (0.94 - 0.95) | 0.92 (0.92 - 0.92)   | 0.94 (0.93 - 0.94)   | 0.93 (0.93- 0.93)  | 0.92 (0.92 - 0.92) | 0.93 (0.93 - 0.94) |
| 0.5                                  | 0.93 (0.92 - 0.93) | 0.90 (0.90 - 0.91)   | 0.90 (0.90 - 0.90)   | 0.90 (0.90 - 0.90) | 0.90 (0.90 - 0.91) | 0.90 (0.90 - 0.90) |
| 1                                    | 0.93 (0.92 - 0.93) | 0.91 (0.90 - 0.91)   | 0.90 (0.90 - 0.90)   | 0.90 (0.90 - 0.90) | 0.91 (0.90 - 0.91) | 0.90 (0.90 - 0.90) |
| 3                                    | 0.93 (0.92 - 0.93) | 0.89 (0.88 - 0.89)   | 0.89 (0.89 - 0.89)   | 0.89 (0.89 - 0.90) | 0.89 (0.89 - 0.89) | 0.89 (0.89 - 0.89) |
| 5                                    | 0.92 (0.91 - 0.92) | 0.84 (0.84 - 0.84)   | 0.86 (0.86 - 0.87)   | 0.85 (0.85 - 0.85) | 0.84 (0.84 - 0.85) | 0.86 (0.86 - 0.86) |

Time prior to test date (years), number of years that electronic health record data was restricted to prior to first encounter date; AUROC, area under the receiver-operating-characteristic curve; NPV, negative predictive value; PPV, positive predictive value.



**Supplementary Table 9.** Clinical features used to train machine learning model.

| Feature                                                                                         | Participants<br>(N=23,938) |
|-------------------------------------------------------------------------------------------------|----------------------------|
| Diagnosis codes — no. (%)                                                                       |                            |
| E55.9 - Vitamin D deficiency, unspecified                                                       | 7328 (29)                  |
| E66.3 - Overweight                                                                              | 2756 (11)                  |
| E66.9 - Obesity, unspecified                                                                    | 5353 (21)                  |
| E78.00 - Pure hypercholesterolemia, unspecified                                                 | 4096 (16)                  |
| E78.5 - Hyperlipidemia, unspecified                                                             | 8227 (33)                  |
| G89.29 - Other chronic pain                                                                     | 4738 (19)                  |
| I10 - Essential (primary) hypertension                                                          | 12146 (49)                 |
| I25.10 - Atherosclerotic heart disease of native coronary artery without angina pectoris        | 3538 (14)                  |
| J06.9 - Acute upper respiratory infection, unspecified                                          | 4877 (20)                  |
| J45.909 - Unspecified asthma, uncomplicated                                                     | 3933 (16)                  |
| K21.9 - Gastro-esophageal reflux disease without esophagitis                                    | 6369 (25)                  |
| M19.90 - Unspecified osteoarthritis, unspecified site                                           | 3018 (12)                  |
| R73.03 - Prediabetes                                                                            | 3484 (14)                  |
| Z00.00 - Encounter for general adult medical examination without abnormal findings              | 13471 (54)                 |
| Z01.419 - Encounter for gynecological examination (general) (routine) without abnormal findings | 5605 (22)                  |
| Z01.810 - Encounter for preprocedural cardiovascular examination                                | 2390 (9.5)                 |
| Z01.818 - Encounter for other preprocedural examination                                         | 5249 (21)                  |
| Z11.3 - Encounter for screening for infections with a predominantly sexual mode of transmission | 2861 (11)                  |
| Z11.59 - Encounter for screening for other viral diseases                                       | 2819 (11)                  |
| Z12.11 - Encounter for screening for malignant neoplasm of colon                                | 5592 (22)                  |
| Z13.220 - Encounter for screening for lipoid disorders                                          | 2670 (11)                  |
| Z23 - Encounter for immunization                                                                | 14446 (58)                 |
| Medications — no. (%)                                                                           |                            |
| Acetaminophen 325 mg tablet                                                                     | 8815 (35)                  |
| Albuterol sulfate hfa 90 mcg/actuation aerosol inhaler                                          | 5244 (21)                  |
| Amlodipine 10 mg tablet                                                                         | 2558 (10)                  |
| Amlodipine 5 mg tablet                                                                          | 3458 (14)                  |
| Aspirin 81 mg chewable tablet                                                                   | 5025 (20)                  |
| Aspirin 81 mg tablet, delayed release                                                           | 2741 (11)                  |
| Atorvastatin 20 mg tablet                                                                       | 2484 (9.9)                 |
| Atorvastatin 40 mg tablet                                                                       | 2704 (11)                  |
| Cephalexin 500 mg capsule                                                                       | 2863 (11)                  |
| Ciprofloxacin 500 mg tablet                                                                     | 2852 (11)                  |
| Dextrose 40 % oral gel                                                                          | 2646 (11)                  |
| Dextrose 50 % in water (d50w) intravenous solution                                              | 2621 (11)                  |
| Docusate sodium 100 mg capsule                                                                  | 6290 (25)                  |
| Famotidine 20 mg tablet                                                                         | 3456 (14)                  |
| Flu vaccine 2015                                                                                | 3092 (12)                  |
| Flu vaccine 2012-13                                                                             | 4571 (18)                  |
| Flu vaccine 2016-17                                                                             | 2771 (11)                  |
| Flu vaccine 2013-14                                                                             | 2651 (11)                  |
| Flu vaccine 2014-15                                                                             | 4003 (16)                  |
| Fluticasone 50 mcg/actuation nasal spray, suspension                                            | 3860 (15)                  |
| Glucagon (human recombinant) 1 mg/ml solution for injection                                     | 2727 (11)                  |

|                                                         |             |
|---------------------------------------------------------|-------------|
| Heparin (porcine) 5,000 unit/ml injection solution      | 3909 (16)   |
| Hydrochlorothiazide 25 mg tablet                        | 2516 (10)   |
| Ibuprofen 400 mg tablet                                 | 4943 (20)   |
| Ibuprofen 600 mg tablet                                 | 3285 (13)   |
| Ketorolac 30 mg/ml (1 ml) injection solution            | 2350 (9.4)  |
| Lisinopril 10 mg tablet                                 | 2379 (9.5)  |
| Naproxen 500 mg tablet                                  | 2972 (12)   |
| Ondansetron HCl (pf) 4 mg/2 ml injection solution       | 5064 (20)   |
| Oxycodone 5 mg tablet                                   | 2869 (11)   |
| Oxycodone-acetaminophen 5 mg-325 mg tablet              | 7756 (31)   |
| Pantoprazole 40 mg tablet, delayed release              | 3411 (14)   |
| Pneumococcal 13-val conjugate vaccine                   | 4025 (16)   |
| Polyethylene glycol 3350 17 gram oral powder packet     | 4575 (18)   |
| Sennosides 8.6 mg tablet                                | 3589 (14)   |
| Sodium chloride 0.9 % intravenous solution              | 3340 (13)   |
| Sodium chloride 0.9 % iv bolus                          | 7318 (29)   |
| Laboratory measurements — median (IQR)                  |             |
| A/G Ratio                                               | 1.5 (0.37)  |
| Albumin, Blood — g/dL                                   | 4.2 (0.5)   |
| Alkaline Phosphatase, Blood — U/L                       | 76 (31)     |
| Amylase, Blood — U/L                                    | 71 (23)     |
| APTT — sec                                              | 30 (3.2)    |
| Atrial Rate (via electrocardiogram) — min <sup>-1</sup> | 74 (14)     |
| Basophil %                                              | 0.40 (0.29) |
| Bilirubin Direct — mg/dL                                | 0.15 (0.10) |
| Bilirubin Total — mg/dL                                 | 0.40 (0.30) |
| Calcium, Blood — mg/dL                                  | 9.4 (0.59)  |
| Carbon Dioxide-Blood — mEq/L                            | 26 (2.7)    |
| Chloride-Blood — mEq/L                                  | 103 (2.5)   |
| Creatinine-Serum — mg/dL                                | 0.90 (0.33) |
| EGFR Non-African American — mL/min/1.73m <sup>2</sup>   | 74 (34)     |
| Ejection Fraction — %                                   | 62 (4.2)    |
| Erythrocyte Sedimentation Rate - Westergren — mm/hr     | 22 (24)     |
| Ferritin — µg/L                                         | 98 (118)    |
| Gamma-Glutamyl Transpeptidase-Blood — U/L               | 33 (30)     |
| Glucose — mg/dL                                         | 91 (22)     |
| Glucose (POCT) By Meter — mg/dL                         | 112 (28)    |
| HDL Cholesterol — mg/dL                                 | 53 (18)     |
| Hematocrit-Venous (POCT) — %                            | 42 (6)      |
| Hemoglobin A1c — %                                      | 5.7 (0.80)  |
| INR                                                     | 1.0 (0.10)  |
| LDH, blood — mg/dL                                      |             |
| Lipase — U/L                                            | 80 (46)     |
| Magnesium, Blood — mEq/L                                | 2.04 (0.17) |
| Mean Corpuscular Hemoglobin Concentration — g/dL        | 34 (0.90)   |
| Mean Corpuscular Volume — fL                            | 34 (0.90)   |
| Neutrophil #                                            | 4.3 (2.3)   |
| Neutrophil %                                            | 62 (13)     |
| Nucleated RBC #                                         | 0 (0)       |

|                                            |               |
|--------------------------------------------|---------------|
| pH - Dipstick                              | 6 (0.65)      |
| Phosphorus-Blood — mg/dL                   | 3.5 (0.32)    |
| Platelet — 10 <sup>9</sup> /L              | 231 (81)      |
| PO2, Venous (POCT) — mmHg                  | 32 (9.0)      |
| QRS Duration — ms                          | 85 (10)       |
| QT — ms                                    | 389 (32)      |
| QTc — ms                                   | 431 (24)      |
| R Axis — °                                 | 29 (39)       |
| Red Blood Cell — 10 <sup>12</sup> /L       | 4.3 (0.67)    |
| Red Cell Distribution Width — %            | 14 (1.6)      |
| Specific Gravity-Dipstick                  | 1.02 (0.0050) |
| TIBC — µg/dL                               | 297 (39)      |
| Transferrin Saturation — %                 | 27 (10)       |
| Triglycerides — mg/dL                      | 111 (65)      |
| Troponin-I — ng/dL                         | 0.026 (0.12)  |
| Urine-Creatinine (Concentration) — mg/dL   | 117 (70)      |
| Urine-pH                                   | 6.0 (0.91)    |
| Urine-Specific Gravity                     | 1.02 (0.0080) |
| Urea Nitrogen-Blood — mg/dL                | 15 (6.5)      |
| Urobilinogen — mg/dL                       | 0.21 (0.21)   |
| Urobilinogen - Dipstick — mg/dL            | 0.25 (0.18)   |
| Vitamin D, 25 Hydroxy — ng/mL              | 25 (9.4)      |
| White Blood Cell — 10 <sup>9</sup> /L      | 6.9 (2.7)     |
| Whole Blood Calcium, Venous (POCT) — mg/dL | 1.2 (0.032)   |
| Whole Blood Chloride, Venous — mEq/L       | 103 (2.0)     |
| Whole Blood CO2, Venous — mEq/L            | 27 (2.9)      |
| Whole Blood Lactate-Venous (POCT) — mEq/L  | 1.2 (0.48)    |
| Whole Blood Sodium, Venous (POCT) — mEq/L  | 139 (2.6)     |
| Whole Blood Sodium, Venous — mEq/L         | 141 (2.0)     |
| Vitals — median (IQR)                      |               |
| Diastolic Blood Pressure — mmHg            | 72 (10)       |
| Height — in                                | 65 (5)        |
| Oxygen saturation — % on room air          | 98 (1.5)      |
| Pain - Abdomen                             | 0 (0)         |
| Pain - Ankle                               | 0 (0)         |
| Pain - Back                                | 0 (0)         |
| Pain - Breast                              | 0 (0)         |
| Pain - Chest                               | 0 (0)         |
| Pain - Left Costal                         | 0 (0)         |
| Pain - Right Costal                        | 0 (0)         |
| Pain - Elbows                              | 0 (0)         |
| Pain - Generalized                         | 0 (0)         |
| Pain - Groin                               | 0 (0)         |
| Pain - Hands                               | 0 (0)         |
| Pain - Head                                | 0 (0)         |
| Pain - Knees                               | 0 (0)         |
| Pain - Left Leg                            | 0 (0)         |
| Pain - Lower Extremities                   | 0 (0)         |
| Pain - Neck                                | 0 (0)         |

|                                                |           |
|------------------------------------------------|-----------|
| Pain - Pelvis                                  | 0 (0)     |
| Pain - Perineum                                | 0 (0)     |
| Pain - Right Leg                               | 0 (0)     |
| Pain - Sacrum                                  | 0 (0)     |
| Pain - Scrotum                                 | 0 (0)     |
| Pain - Shoulder                                | 0 (0)     |
| Pain - Throat                                  | 0 (0)     |
| Pain - Upper Extremities                       | 0 (0)     |
| Pain - Wrist                                   | 0 (0)     |
| Pulse (via pulse oximetry) — sec <sup>-1</sup> | 77 (13)   |
| Respirations — min <sup>-1</sup>               | 18 (1.0)  |
| Systolic Blood Pressure — mmHg                 | 126 (18)  |
| Temperature — °F                               | 98 (0.60) |

---

IQR, interquartile range; diagnosis codes, International Classification of Diseases (ICD)-10 codes; IV, intravenous; IM, intramuscular; A/G, albumin/globulin; APTT, activated partial thromboplastin time; EGFR, estimated glomerular filtration rate; INR, international normalized ratio; HDL, high-density lipoprotein; TIBC, total iron-binding capacity; pain, pain scale from 0 (no pain) to 10 (worst pain).

**Supplementary Table 10.** Set of 18 autoimmune conditions for validation of model.

| Autoimmune condition                         | ICD-10 diagnosis code      | Cases, n (%) |
|----------------------------------------------|----------------------------|--------------|
| Addison's disease <sup>2,3</sup>             | E27.1, E27.2, E27.4        | 320 (0.89)   |
| Ankylosing spondylitis <sup>4,5</sup>        | M45*                       | 82 (0.23)    |
| Autoimmune hepatitis <sup>6</sup>            | K75.4                      | 132 (0.37)   |
| Crohn's disease <sup>7,8</sup>               | K50*                       | 502 (1.4)    |
| Giant cell arteritis <sup>9,10</sup>         | M31.5, M31.6               | 128 (0.36)   |
| Glomerulonephritis <sup>11</sup>             | N00*, N01*, N03*           | 229 (0.64)   |
| Graves' disease <sup>12,13</sup>             | E05.0*                     | 589 (1.6)    |
| Hashimoto's thyroiditis <sup>12,13</sup>     | E06.3                      | 1,165 (3.2)  |
| Multiple sclerosis <sup>14</sup>             | G35*                       | 288 (0.80)   |
| Myasthenia gravis <sup>15</sup>              | G70*                       | 93 (0.26)    |
| Optic neuritis <sup>16,17</sup>              | H46.0, H46.1, H46.8, H46.9 | 108 (0.30)   |
| Polyarteritis nodosa <sup>18</sup>           | M30*                       | 18 (0.050)   |
| Psoriasis <sup>19,20</sup>                   | L40*                       | 916 (2.6)    |
| Rheumatic mitral valve disease <sup>21</sup> | I05*                       | 493 (1.4)    |
| Sarcoidosis <sup>22</sup>                    | D86*                       | 571 (1.6)    |
| Type 1 diabetes <sup>23</sup>                | E10*                       | 968 (2.7)    |
| Ulcerative colitis <sup>7,8</sup>            | K51*                       | 370 (1.0)    |
| Vitiligo <sup>24</sup>                       | L80                        | 175 (0.49)   |

ICD-10, International Classification of Diseases 10; n, number; \*, indicates any ICD-10 code below the stated parent level (e.g., L40\* includes L40.0, L40.1, L40.2, L40.3, etc.).

### References

1. Marc Overhage, J., Ryan, P. B., Reich, C. G., Hartzema, A. G. & Stang, P. E. Validation of a common data model for active safety surveillance research. *J. Am. Med. Informatics Assoc.* **19**, 54–60 (2012).
2. Skov, J. *et al.* Heritability of Addison's disease and prevalence of associated autoimmunity in a cohort of 112,100 Swedish twins. *Endocrine* **58**, 521–527 (2017).
3. Olafsson, A. S. nae. & Sigurjonsdottir, H. A. gust. Increasing Prevalence Of Addison Disease: Results From A Nationwide Study. *Endocr. Pract.* **22**, 30–35 (2016).
4. Walsh, J., Hunter, T., Schroeder, K., Sandoval, D. & Bolce, R. Trends in diagnostic prevalence and treatment patterns of male and female ankylosing spondylitis patients in the United States, 2006-2016. *BMC Rheumatol.* **3**, (2019).
5. Lindström, U. *et al.* Validity of ankylosing spondylitis and undifferentiated spondyloarthritis diagnoses in the Swedish National Patient Register. *Scand. J. Rheumatol.* **44**, 369–376 (2015).
6. Kim, B. H. *et al.* Population-based prevalence, incidence, and disease burden of autoimmune hepatitis in South Korea. *PLoS One* **12**, (2017).
7. Stepaniuk, P., Bernstein, C. N., Nugent, Z. & Singh, H. Characterization of inflammatory bowel disease in hospitalized elderly patients in a large central Canadian health region. *Can. J. Gastroenterol. Hepatol.* **29**, 274 (2015).

8. Xu, F., Wheaton, A. G., Liu, Y., Lu, H. & Greenlund, K. J. Hospitalizations for Inflammatory Bowel Disease Among Medicare Fee-for-Service Beneficiaries — United States, 1999–2017. *Morb. Mortal. Wkly. Rep.* **68**, 1134–1138 (2019).
9. Aouba, A. *et al.* Mortality causes and trends associated with giant cell arteritis: Analysis of the French national death certificate database (1980-2011). *Rheumatol. (United Kingdom)* **57**, 1047–1055 (2018).
10. Wiberg, F., Naderi, N., Mohammad, A. J. & Turesson, C. Evaluation of revised classification criteria for giant cell arteritis and its clinical phenotypes. *Rheumatol. (United Kingdom)* **61**, 383–387 (2022).
11. Guo, Q., Wu, S., Xu, C. P., Wang, J. & Chen, J. Global Disease Burden From Acute Glomerulonephritis 1990–2019. *Kidney Int. Reports* **6**, 2212–2217 (2021).
12. Jølving, L. R. *et al.* Chronic diseases in the children of women with maternal thyroid dysfunction: A nationwide cohort study. *Clin. Epidemiol.* **10**, 1381–1390 (2018).
13. Song, Y. S., Kim, K. S., Kim, S. K., Cho, Y. W. & Choi, H. G. Screening leads to overestimated associations of thyroid dysfunction and thyroiditis with thyroid cancer risk. *Cancers (Basel)*. **13**, 5385 (2021).
14. St. Germaine-Smith, C. *et al.* Recommendations for optimal ICD codes to study neurologic conditions a systematic review. *Neurology* **79**, 1049–1055 (2012).
15. Chen, J. *et al.* Incidence, mortality, and economic burden of myasthenia gravis in China: A nationwide population-based study. *Lancet Reg. Heal. - West. Pacific* **5**, 100063 (2020).
16. Nien, C. W. *et al.* The development of optic neuropathy after chronic rhinosinusitis: A population-based cohort study. *PLoS One* **14**, (2019).
17. Gu, W. *et al.* Incidence of Optic Neuritis and the Associated Risk of Multiple Sclerosis for Service Members of U.S. Armed Forces. *Mil. Med.* (2021) doi:10.1093/milmed/usab352.
18. Gokhale, M. *et al.* Prevalence of Eosinophilic Granulomatosis With Polyangiitis and Associated Health Care Utilization Among Patients With Concomitant Asthma in US Commercial Claims Database. *J. Clin. Rheumatol.* **27**, 107–113 (2021).
19. Koch, M. *et al.* Psoriasis and cardiometabolic traits: Modest association but distinct genetic architectures. *J. Invest. Dermatol.* **135**, 1283–1293 (2015).
20. Duvetorp, A., Mrowietz, U., Nilsson, M. & Seifert, O. Sex and Age Influence the Associated Risk of Depression in Patients with Psoriasis: A Retrospective Population Study Based on Diagnosis and Drug-Use. *Dermatology* **237**, 595–602 (2021).
21. Auckland, K. *et al.* The Human Leukocyte Antigen Locus and Rheumatic Heart Disease Susceptibility in South Asians and Europeans. *Sci. Rep.* **10**, 1–9 (2020).
22. Martusewicz-Boros, M. M., Boros, P. W., Wiatr, E., Fijołek, J. & Roszkowski-Śliż, K. Systemic treatment for sarcoidosis was needed for 16% of 1810 Caucasian patients. *Clin. Respir. J.* **12**, 1367–1371 (2018).
23. Dugan, J. & Shubrook, J. International Classification of Diseases, 10th Revision, Coding for Diabetes. *Clin. Diabetes* **35**, 232–238 (2017).
24. Lee, Y. B. & Kim, H. S. Height and risk of vitiligo: A nationwide cohort study. *J. Clin. Med.* **10**, (2021).
